# Supplementary material for: Association of the Amount and Pattern of Physical Activity With Arterial Stiffness: The Maastricht Study
Source: PubMed Central journal article supplement — J Am Heart Assoc. 2020 Oct 15;9(20):e017502. doi: 10.1161/JAHA.120.017502 (PMC7763372; doi:10.1161/jaha.120.017502), 2020-10-15
Supplement: JAH3-9-e017502-s001.pdf [file JAH3-9-e017502-s001.pdf]

# **SUPPLEMENTAL MATERIAL**

**Table S1. Descriptive characteristics of the in- and exclusion study population.**

| <i>Characteristics</i>           | <i>Inclusion</i><br>( <i>n=1699</i> ) | <i>Exclusion</i><br>( <i>n = 1752</i> ) |
|----------------------------------|---------------------------------------|-----------------------------------------|
| Age (years)                      | 60.45 (7.88)                          | 59.10 (8.58)                            |
| Sex (% male)                     | 50.60                                 | 52.30                                   |
| Education level (%)              |                                       |                                         |
| • Low                            | 32.50                                 | 34.60                                   |
| • Medium                         | 28.60                                 | 27.90                                   |
| • High                           | 38.80                                 | 37.50                                   |
| Mean arterial pressure<br>(mmHg) | 96.71 (10.27)                         | 96.75 (10.37)                           |
| Mean heart rate (bpm)            | 62.30 (9.40)                          | 63.38 (9.37)                            |
| Smoking status (%)               |                                       |                                         |
| • Current                        | 11.90                                 | 15.80                                   |
| • Former                         | 53.40                                 | 49.90                                   |
| • Never                          | 34.70                                 | 34.30                                   |
| Alcohol consumption (%)          |                                       |                                         |
| • None                           | 17.30                                 | 19.90                                   |
| • Low                            | 56.50                                 | 54.40                                   |
| • High                           | 26.20                                 | 25.70                                   |
| Mobility limitations             |                                       |                                         |
| • Yes                            | 19.80                                 | 23.90                                   |
| • Non                            | 80.20                                 | 76.10                                   |
| BMI (kg/m <sup>2</sup> )         | 26.77 (4.16)                          | 27.10 (4.90)                            |
| History of CVD (%)               | 16.20                                 | 17.20                                   |
| Diabetes status (%)              |                                       |                                         |
| • Yes                            | 26.90                                 | 29.60                                   |

|                                            |                  |                  |
|--------------------------------------------|------------------|------------------|
| • No                                       | 73.10            | 68.10            |
| Antihypertensive medication use (%)        | 40.30            | 39.70            |
| Lipid-modifying medication use (%)         | 36.70            | 36.30            |
| Glucose-lowering medication use (%)        | 21.00            | 25.70            |
| Total cholesterol-to-HDL cholesterol ratio | 3.40 [2.78-4.23] | 3.53 [2.88-4.33] |
| Triglycerides (mmol/L)                     | 1.21 [0.89-1.7]  | 1.20 [0.87-1.74] |
| cfPWV (m/s)                                | 9.05 (2.16)      | 8.97 (2.16)      |
| Carotid DC (10 <sup>3</sup> /kPa)          | 14.29 (4.98)     | 14.33 (5.34)     |
| Valid days (n)                             | 6.65 (0.48)      | 3.00 (3.02)      |
| Time of HPA/week (min)                     | 150.65 (118.98)  | 121.13 (112.73)  |

Values are means (SD) or median [Q1-Q3], unless stated otherwise. BMI, body mass index;

cfPWV carotid to femoral pulse wave velocity; Carotid DC carotid distensibility coefficient;

HPA higher intensity physical activity.
